# Supplementary material for: Distribution patterns of small-molecule ligands in the protein universe and implications for origin of life and drug discovery
Source: Springer Nature journal article supplement (doi:10.1186/gb-2007-8-8-r176), 2007-08-29
Supplement: Additional file 5 [file gb-2007-8-8-r176-s5.doc]

**Additional data file 5**

Figure S3. Building block usage of bio-ligands. It can be found that nucleic acid bases are most frequently used building blocks, followed by carbohydrates and amino acids.
